# Supplementary material
Source: MDPI journal article supplement (https://www.mdpi.com/2673-3986/5/1/2)
Supplement: s1 [file s1]

Q37 Which of the following activities did your child do LAST WEEKEND?

(record “0” for any activities that your child did not do)

|                                                                                                                                                                                                                                                                                      |                                 |                          | Saturday                                                                            |                                  |                          | Sunday                                                                              |
|--------------------------------------------------------------------------------------------------------------------------------------------------------------------------------------------------------------------------------------------------------------------------------------|---------------------------------|--------------------------|-------------------------------------------------------------------------------------|----------------------------------|--------------------------|-------------------------------------------------------------------------------------|
|                                                                                                                                                                                                                                                                                      | Did your child do this activity |                          | Total time spent in activity?                                                       | Did your child do this activity? |                          | Total time spent in activity                                                        |
|                                                                                                                                                                                                                                                                                      | Yes                             | No                       | Hours/Minutes                                                                       | Yes                              | No                       | Hours/Minutes                                                                       |
| Sat or lay still watching TV                                                                                                                                                                                                                                                         | <input type="checkbox"/>        | <input type="checkbox"/> | <input type="checkbox"/> hrs <input type="checkbox"/> <input type="checkbox"/> mins | <input type="checkbox"/>         | <input type="checkbox"/> | <input type="checkbox"/> hrs <input type="checkbox"/> <input type="checkbox"/> mins |
| Sat or lay still watching a DVD or a video                                                                                                                                                                                                                                           | <input type="checkbox"/>        | <input type="checkbox"/> | <input type="checkbox"/> hrs <input type="checkbox"/> <input type="checkbox"/> mins | <input type="checkbox"/>         | <input type="checkbox"/> | <input type="checkbox"/> hrs <input type="checkbox"/> <input type="checkbox"/> mins |
| Sat or lay still (e.g., looking at books or listening to stories)                                                                                                                                                                                                                    | <input type="checkbox"/>        | <input type="checkbox"/> | <input type="checkbox"/> hrs <input type="checkbox"/> <input type="checkbox"/> mins | <input type="checkbox"/>         | <input type="checkbox"/> | <input type="checkbox"/> hrs <input type="checkbox"/> <input type="checkbox"/> mins |
| Played computer or electronic games                                                                                                                                                                                                                                                  | <input type="checkbox"/>        | <input type="checkbox"/> | <input type="checkbox"/> hrs <input type="checkbox"/> <input type="checkbox"/> mins | <input type="checkbox"/>         | <input type="checkbox"/> | <input type="checkbox"/> hrs <input type="checkbox"/> <input type="checkbox"/> mins |
| Was <b>stationary</b> but moving a part of the body such as swimming or swaying trunk (e.g., standing and swaying to a song) or moving arm or leg (e.g., sitting doing puzzles or craft, digging in a sandpit or standing and kicking or throwing a ball, doing movements to a song) | <input type="checkbox"/>        | <input type="checkbox"/> | <input type="checkbox"/> hrs <input type="checkbox"/> <input type="checkbox"/> mins | <input type="checkbox"/>         | <input type="checkbox"/> | <input type="checkbox"/> hrs <input type="checkbox"/> <input type="checkbox"/> mins |
| Walked at a <b>leisure or moderate pace</b> (from any reason – not just when going a walk)                                                                                                                                                                                           | <input type="checkbox"/>        | <input type="checkbox"/> | <input type="checkbox"/> hrs <input type="checkbox"/> <input type="checkbox"/> mins | <input type="checkbox"/>         | <input type="checkbox"/> | <input type="checkbox"/> hrs <input type="checkbox"/> <input type="checkbox"/> mins |
| Walked at a <b>fast pace</b>                                                                                                                                                                                                                                                         | <input type="checkbox"/>        | <input type="checkbox"/> | <input type="checkbox"/> hrs <input type="checkbox"/> <input type="checkbox"/> mins | <input type="checkbox"/>         | <input type="checkbox"/> | <input type="checkbox"/> hrs <input type="checkbox"/> <input type="checkbox"/> mins |
| Walked up steel slopes                                                                                                                                                                                                                                                               | <input type="checkbox"/>        | <input type="checkbox"/> | <input type="checkbox"/> hrs <input type="checkbox"/> <input type="checkbox"/> mins | <input type="checkbox"/>         | <input type="checkbox"/> | <input type="checkbox"/> hrs <input type="checkbox"/> <input type="checkbox"/> mins |
| Ran or jogged <b>slowly</b>                                                                                                                                                                                                                                                          | <input type="checkbox"/>        | <input type="checkbox"/> | <input type="checkbox"/> hrs <input type="checkbox"/> <input type="checkbox"/> mins | <input type="checkbox"/>         | <input type="checkbox"/> | <input type="checkbox"/> hrs <input type="checkbox"/> <input type="checkbox"/> mins |
| Ran or jogged <b>quickly</b>                                                                                                                                                                                                                                                         | <input type="checkbox"/>        | <input type="checkbox"/> | <input type="checkbox"/> hrs <input type="checkbox"/> <input type="checkbox"/> mins | <input type="checkbox"/>         | <input type="checkbox"/> | <input type="checkbox"/> hrs <input type="checkbox"/> <input type="checkbox"/> mins |
| Rough and tumble play with <b>moderate effort</b>                                                                                                                                                                                                                                    | <input type="checkbox"/>        | <input type="checkbox"/> | <input type="checkbox"/> hrs <input type="checkbox"/> <input type="checkbox"/> mins | <input type="checkbox"/>         | <input type="checkbox"/> | <input type="checkbox"/> hrs <input type="checkbox"/> <input type="checkbox"/> mins |
| Rough and tumble play with <b>hard effort</b>                                                                                                                                                                                                                                        | <input type="checkbox"/>        | <input type="checkbox"/> | <input type="checkbox"/> hrs <input type="checkbox"/> <input type="checkbox"/> mins | <input type="checkbox"/>         | <input type="checkbox"/> | <input type="checkbox"/> hrs <input type="checkbox"/> <input type="checkbox"/> mins |

|                                                                                 |                                 |                          | Saturday                                                                            |                                  |                          | Sunday                                                                              |
|---------------------------------------------------------------------------------|---------------------------------|--------------------------|-------------------------------------------------------------------------------------|----------------------------------|--------------------------|-------------------------------------------------------------------------------------|
|                                                                                 | Did your child do this activity |                          | Total time spent in activity?                                                       | Did your child do this activity? |                          | Total time spent in activity                                                        |
|                                                                                 | Yes                             | No                       | Hours/Minutes                                                                       | Yes                              | No                       | Hours/Minutes                                                                       |
| Hopped, jumped, skipped or marched at an <b>easy pace</b>                       | <input type="checkbox"/>        | <input type="checkbox"/> | <input type="checkbox"/> hrs <input type="checkbox"/> <input type="checkbox"/> mins | <input type="checkbox"/>         | <input type="checkbox"/> | <input type="checkbox"/> hrs <input type="checkbox"/> <input type="checkbox"/> mins |
| Hopped, jumped, skipped or marched with a <b>moderate speed or effort</b>       | <input type="checkbox"/>        | <input type="checkbox"/> | <input type="checkbox"/> hrs <input type="checkbox"/> <input type="checkbox"/> mins | <input type="checkbox"/>         | <input type="checkbox"/> | <input type="checkbox"/> hrs <input type="checkbox"/> <input type="checkbox"/> mins |
| Hopped, jumped, skipped or marched with <b>fast speed or hard effort</b>        | <input type="checkbox"/>        | <input type="checkbox"/> | <input type="checkbox"/> hrs <input type="checkbox"/> <input type="checkbox"/> mins | <input type="checkbox"/>         | <input type="checkbox"/> | <input type="checkbox"/> hrs <input type="checkbox"/> <input type="checkbox"/> mins |
| Danced or did movement and music activities (moving around)                     | <input type="checkbox"/>        | <input type="checkbox"/> | <input type="checkbox"/> hrs <input type="checkbox"/> <input type="checkbox"/> mins | <input type="checkbox"/>         | <input type="checkbox"/> | <input type="checkbox"/> hrs <input type="checkbox"/> <input type="checkbox"/> mins |
| Climbed (e.g., on play equipment, in a tree etc.)                               | <input type="checkbox"/>        | <input type="checkbox"/> | <input type="checkbox"/> hrs <input type="checkbox"/> <input type="checkbox"/> mins | <input type="checkbox"/>         | <input type="checkbox"/> | <input type="checkbox"/> hrs <input type="checkbox"/> <input type="checkbox"/> mins |
| Used swing (moving self. Not being pushed by another person)                    | <input type="checkbox"/>        | <input type="checkbox"/> | <input type="checkbox"/> hrs <input type="checkbox"/> <input type="checkbox"/> mins | <input type="checkbox"/>         | <input type="checkbox"/> | <input type="checkbox"/> hrs <input type="checkbox"/> <input type="checkbox"/> mins |
| Rode a tricycle, bike or scooter etc. at an <b>easy pace or slow speed</b>      | <input type="checkbox"/>        | <input type="checkbox"/> | <input type="checkbox"/> hrs <input type="checkbox"/> <input type="checkbox"/> mins | <input type="checkbox"/>         | <input type="checkbox"/> | <input type="checkbox"/> hrs <input type="checkbox"/> <input type="checkbox"/> mins |
| Rode a tricycle, bike or scooter etc. at a <b>moderate pace or medium speed</b> | <input type="checkbox"/>        | <input type="checkbox"/> | <input type="checkbox"/> hrs <input type="checkbox"/> <input type="checkbox"/> mins | <input type="checkbox"/>         | <input type="checkbox"/> | <input type="checkbox"/> hrs <input type="checkbox"/> <input type="checkbox"/> mins |
| Swam by self ( $\pm$ floatation devices)                                        | <input type="checkbox"/>        | <input type="checkbox"/> | <input type="checkbox"/> hrs <input type="checkbox"/> <input type="checkbox"/> mins | <input type="checkbox"/>         | <input type="checkbox"/> | <input type="checkbox"/> hrs <input type="checkbox"/> <input type="checkbox"/> mins |
| Swam with support of an adult                                                   | <input type="checkbox"/>        | <input type="checkbox"/> | <input type="checkbox"/> hrs <input type="checkbox"/> <input type="checkbox"/> mins | <input type="checkbox"/>         | <input type="checkbox"/> | <input type="checkbox"/> hrs <input type="checkbox"/> <input type="checkbox"/> mins |
| Other (please state)                                                            | <input type="checkbox"/>        | <input type="checkbox"/> | <input type="checkbox"/> hrs <input type="checkbox"/> <input type="checkbox"/> mins | <input type="checkbox"/>         | <input type="checkbox"/> | <input type="checkbox"/> hrs <input type="checkbox"/> <input type="checkbox"/> mins |
| Other (please state)                                                            | <input type="checkbox"/>        | <input type="checkbox"/> | <input type="checkbox"/> hrs <input type="checkbox"/> <input type="checkbox"/> mins | <input type="checkbox"/>         | <input type="checkbox"/> | <input type="checkbox"/> hrs <input type="checkbox"/> <input type="checkbox"/> mins |

Thank you for completing this questionnaire

ALL INFORMATION WILL BE KEPT STRICTLY CONFIDENTIAL

**ALL INFORMATION WILL BE KEPT STRICTLY CONFIDENTIAL**

**ALL INFORMATION WILL BE KEPT STRICTLY CONFIDENTIAL**
