# Supplementary material
Source: MDPI journal article supplement (https://www.mdpi.com/2673-3986/5/1/2)
Supplement: s1 [file s1]

Date: \_\_\_\_\_

ID# \_\_\_\_\_

# PedsQL

## Paediatric Quality of life Inventory

Version 4.0

### **PARENT REPORT for TODDLERS (ages 2-4)**

#### **DIRECTIONS**

On the following page is a list of things that might be a problem for **your child**.

Please tell us how much of a problem each one has been for your child during the **PAST MONTH** by circling:

0 if it is **never** a problem

1 if it is **almost never** a problem

2 if it is **sometimes** a problem

3 if it is **often** a problem

4 if it is **almost always** a problem

There are no right or wrong answers.

If you do not understand a question, please ask for help.

In the **PAST MONTH**, how much of a **problem** has your child had with ...

| <b>PHYSICAL FUNCTIONING (problems with ...)</b> | <b>Never</b> | <b>Almost<br/>Never</b> | <b>Some-<br/>times</b> | <b>Often</b> | <b>Almost<br/>Always</b> |
|-------------------------------------------------|--------------|-------------------------|------------------------|--------------|--------------------------|
| 1. Walking                                      | 0            | 1                       | 2                      | 3            | 4                        |
| 2. Running                                      | 0            | 1                       | 2                      | 3            | 4                        |
| 3. Participating in active play and exercise    | 0            | 1                       | 2                      | 3            | 4                        |
| 4. Lifting heavy things                         | 0            | 1                       | 2                      | 3            | 4                        |
| 5. Bathing                                      | 0            | 1                       | 2                      | 3            | 4                        |
| 6. Helping to pick up his or her toys           | 0            | 1                       | 2                      | 3            | 4                        |
| 7. Having aches or pains                        | 0            | 1                       | 2                      | 3            | 4                        |
| 8. Feeling tired                                | 0            | 1                       | 2                      | 3            | 4                        |

| <b>EMOTIONAL FUNCTIONING (problems with ...)</b> | <b>Never</b> | <b>Almost<br/>Never</b> | <b>Some-<br/>times</b> | <b>Often</b> | <b>Almost<br/>Always</b> |
|--------------------------------------------------|--------------|-------------------------|------------------------|--------------|--------------------------|
| 1. Feeling afraid or scared                      | 0            | 1                       | 2                      | 3            | 4                        |
| 2. Feeling sad                                   | 0            | 1                       | 2                      | 3            | 4                        |
| 3. Feeling angry                                 | 0            | 1                       | 2                      | 3            | 4                        |
| 4. Having trouble sleeping                       | 0            | 1                       | 2                      | 3            | 4                        |
| 5. Worrying                                      | 0            | 1                       | 2                      | 3            | 4                        |

| <b>SOCIAL FUNCTIONING (problems with ...)</b>                      | <b>Never</b> | <b>Almost<br/>Never</b> | <b>Some-<br/>times</b> | <b>Often</b> | <b>Almost<br/>Always</b> |
|--------------------------------------------------------------------|--------------|-------------------------|------------------------|--------------|--------------------------|
| 1. Playing with other children                                     | 0            | 1                       | 2                      | 3            | 4                        |
| 2. Other children not wanting to play with him or her              | 0            | 1                       | 2                      | 3            | 4                        |
| 3. Getting teased by other children                                | 0            | 1                       | 2                      | 3            | 4                        |
| 4. Not able to do things that other children his or her age can do | 0            | 1                       | 2                      | 3            | 4                        |
| 5. Keeping up when playing with other children                     | 0            | 1                       | 2                      | 3            | 4                        |

***\*Please complete this section if your child attends nursery or day care***

| <b>NURSERY/DAY CARE FUNCTIONING (problems with ...)</b>     | <b>Never</b> | <b>Almost<br/>Never</b> | <b>Some-<br/>times</b> | <b>Often</b> | <b>Almost<br/>Always</b> |
|-------------------------------------------------------------|--------------|-------------------------|------------------------|--------------|--------------------------|
| 1. Doing the same nursery/day care activities as peers      | 0            | 1                       | 2                      | 3            | 4                        |
| 2. Missing nursery/day care because of not feeling well     | 0            | 1                       | 2                      | 3            | 4                        |
| 3. Missing nursery/day care to go to the doctor or hospital | 0            | 1                       | 2                      | 3            | 4                        |
