# Supplementary material
Source: MDPI journal article supplement (https://www.mdpi.com/2673-3986/5/1/2)
Supplement: s1 [file s1]

## KIDMED QUESTIONNAIRE

|                                                                  |                              |                             |  |
|------------------------------------------------------------------|------------------------------|-----------------------------|--|
| 1. Takes a fruit or fruit juice every day?                       | Yes <input type="checkbox"/> | No <input type="checkbox"/> |  |
| 2. Has a second fruit every day?                                 | Yes <input type="checkbox"/> | No <input type="checkbox"/> |  |
| 3. Has fresh or cooked vegetables regularly once a day?          | Yes <input type="checkbox"/> | No <input type="checkbox"/> |  |
| 4. Has fresh or cooked vegetables more than once a day?          | Yes <input type="checkbox"/> | No <input type="checkbox"/> |  |
| 5. Consumes fish regularly (at least 2-3/week)?                  | Yes <input type="checkbox"/> | No <input type="checkbox"/> |  |
| 6. Goes > 1 / week to a fast-food restaurant (hamburger)?        | Yes <input type="checkbox"/> | No <input type="checkbox"/> |  |
| 7. Likes pulses and eats them > 1 / week                         | Yes <input type="checkbox"/> | No <input type="checkbox"/> |  |
| 8. Consumes pasta or rice almost every day (5 or more per week)? | Yes <input type="checkbox"/> | No <input type="checkbox"/> |  |
| 9. Has cereals or grains (bread, etc) for breakfast?             | Yes <input type="checkbox"/> | No <input type="checkbox"/> |  |
| 10. Consumes nuts regularly (at least 2-3/week)?                 | Yes <input type="checkbox"/> | No <input type="checkbox"/> |  |
| 11. Uses olive oil at home?                                      | Yes <input type="checkbox"/> | No <input type="checkbox"/> |  |
| 12. Skips breakfasts?                                            | Yes <input type="checkbox"/> | No <input type="checkbox"/> |  |
| 13. Has a dairy product for breakfast (yogurt, milk, etc)?       | Yes <input type="checkbox"/> | No <input type="checkbox"/> |  |
| 14. Has commercially baked goods or pastries for breakfast?      | Yes <input type="checkbox"/> | No <input type="checkbox"/> |  |
| 15. Takes two yogurts and/or some cheese (40g) daily?            | Yes <input type="checkbox"/> | No <input type="checkbox"/> |  |
| 16. Takes sweets and candy several times every day?              | Yes <input type="checkbox"/> | No <input type="checkbox"/> |  |
| <b>KMS:</b>                                                      |                              |                             |  |
